# Supplementary material for: A multifunctional artificial protective layer for producing an ultra-stable lithium metal anode in a commercial carbonate electrolyte
Source: Royal Society of Chemistry journal article supplement (doi:10.1039/d1ta00408e), 2021-01-01
Supplement: d1ta00408e1.pdf [file d1ta00408e1.pdf]

## Supporting Information

### A Multifunctional Artificial Protective Layer Producing an Ultra-stable Lithium Metal Anode in a Commercial Carbonate Electrolyte

Song Li, Xian-Shu Wang, Qi-Dong Li, Qi Liu, Pei-Ran Shi, Jing Yu, Wei Lv, Feiyu Kang, Yan-Bing He, \* Quan-Hong Yang

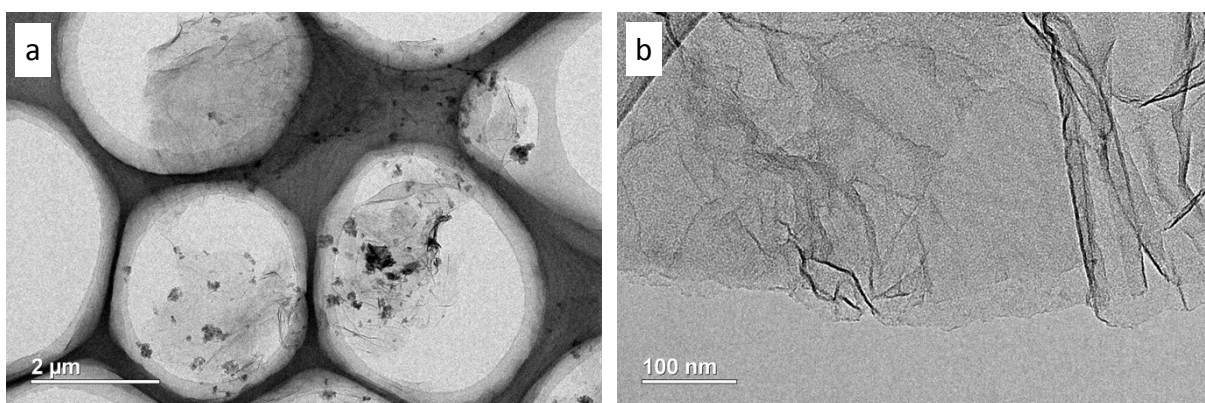

Figure S1. TEM of GO nanosheet

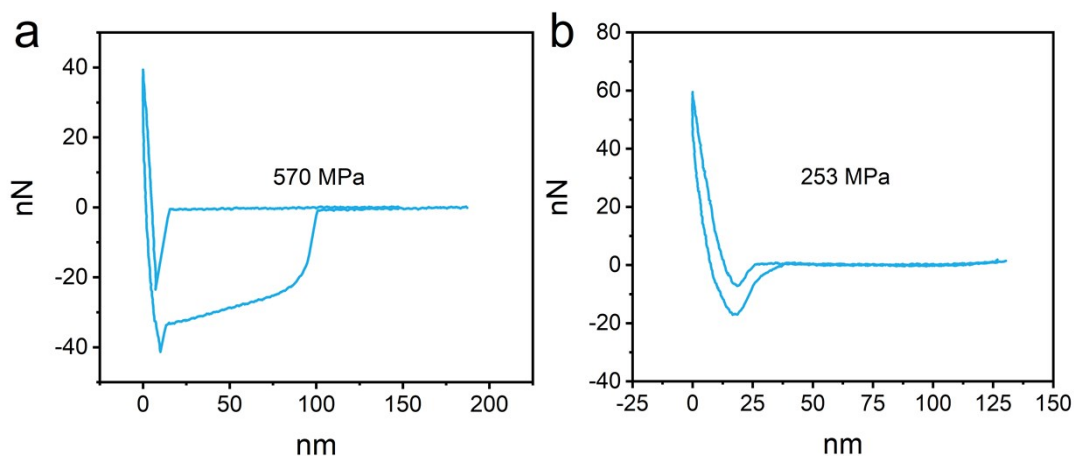

Figure S2. The mechanical properties of (a) MAP with GO and (b) MAP without GO via AFM characterization.

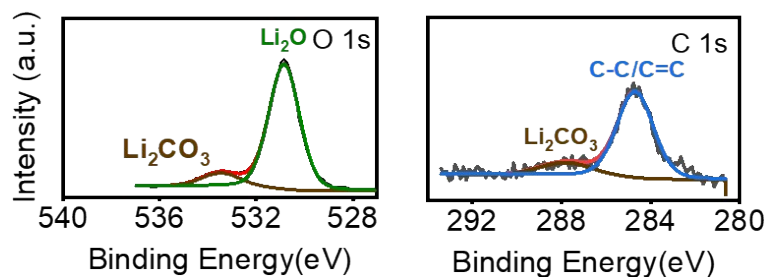

Figure S3. The O 1s and C 1s spectra of pristine Li.

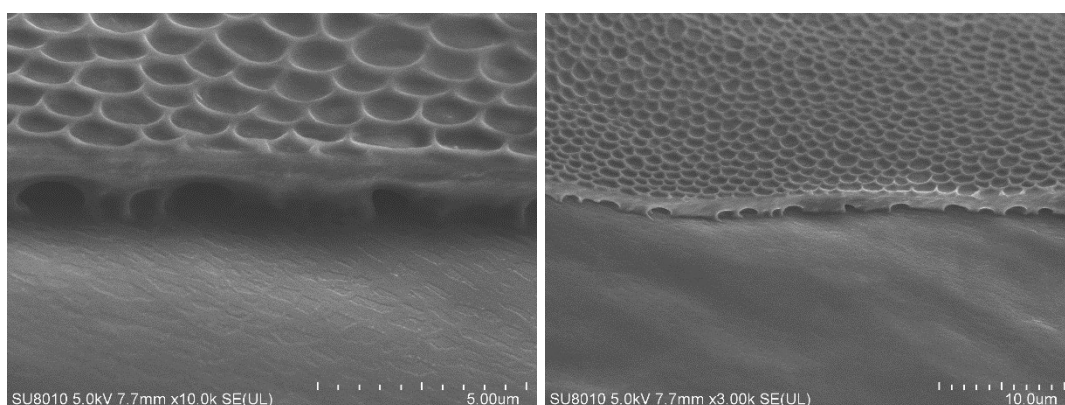

**Figure S4.** Cross sectional SEM of a MAP-modified lithium anode.

**Table S1.** The cycle life of different kinds of lithium anode modified with a SEI in a carbonate liquid electrolyte

| Artificial SEIs                                                                  | Test condition                                      | Cycle life | Reference |
|----------------------------------------------------------------------------------|-----------------------------------------------------|------------|-----------|
| graphite fluoride                                                                | 1 mA cm <sup>-2</sup>                               | 250 h      | [1]       |
| PAA                                                                              | 0.5 mA cm <sup>-2</sup>                             | 700 h      | [2]       |
|                                                                                  | 1 mA cm <sup>-2</sup>                               | 250 h      |           |
| ZnO/PVDF-HFP                                                                     | 0.5 mA cm <sup>-2</sup>                             | 500 h      | [3]       |
| Li <sub>3</sub> PO <sub>4</sub>                                                  | 0.5 mA cm <sup>-2</sup>                             | 900 h      | [4]       |
| NiF <sub>2</sub>                                                                 | 0.5 mA cm <sup>-2</sup>                             | 1000 h     | [5]       |
| poly((N-2,2-dimethyl-1,3-dioxolane-4-methyl)-5-norbornene-exo-2,3-dicarboximide) | 1.0 mA cm <sup>-2</sup><br>0.5 mAh cm <sup>-2</sup> | 300 h      | [6]       |
| SBR/Li <sub>3</sub> Sb                                                           | 1.0 mA cm <sup>-2</sup>                             | 500 h      | [7]       |
| organic alucone/Al <sub>2</sub> O <sub>3</sub>                                   | 1 mA cm <sup>-2</sup>                               | 900 h      | [8]       |
| <b>This work</b>                                                                 | 1 mA cm <sup>-2</sup>                               | > 1100 h   |           |

- [1] X. W. Shen, Y. T. Li, T. Qian, J. Liu, J. Q. Zhou, C. L. Yan and J. B. Goodenough, *Nature Commun.* **2019**, 1, 900.
- [2] N. W. Li, Y. Shi, Y. X. Yin, X. X. Zeng, J. Y. Li, C. J. Li, L. J. Wan, R. Wen and Y. G. Guo, *Angew. Chem. Int. Ed.* **2018**, 57, 1505.
- [3] Y. T. He, Y. H. Zhang, X. F. Li, Z. Lv, X. J. Wang, Z. G. Liu and X. Q. Huang, *Energy Storage Mater.* **2018**, 14, 392.
- [4] L. P. Wang, Q. J. Wang, W. S. Jia, S. L. Chen, P. Gao and J. Z. Li, *J. Power Sources* **2017**, 342, 175.
- [5] Z. Peng, N. Zhao, Z. G. Zhang, H. Wan, H. Lin, M. Liu, C. Shen, H. Y. He, X. X. Guo, J. G. Zhang and D. Y. Wang, *Nano Energy* **2017**, 39, 662.
- [6] Y. Gao, Y. M. Zhao, Y. C. Li, Q. Q. Huang, T. E. Mallouk and D. H. Wang, *J. Am. Chem. Soc.* **2017**, 139, 15288.
- [7] Y. J. Zhang, G. Y. Wang, L. Tang, J. J. Wu, B. K. Guo, M. Zhu, C. Wu, S. X. Dou and M. H. Wu, *J. Mater. Chem. A* **2019**, 7, 25369.
- [8] Y. Zhao, M. Amirmaleki, Q. Sun, C. T. Zhao, A. Codireenzi, L. V. Goncharova, C. H. Wang, K. Adair, X. Li, X. F. Yang, F. P. Zhao, R. Y. Li, T. Filleter, M. Cai and X. L. Sun,

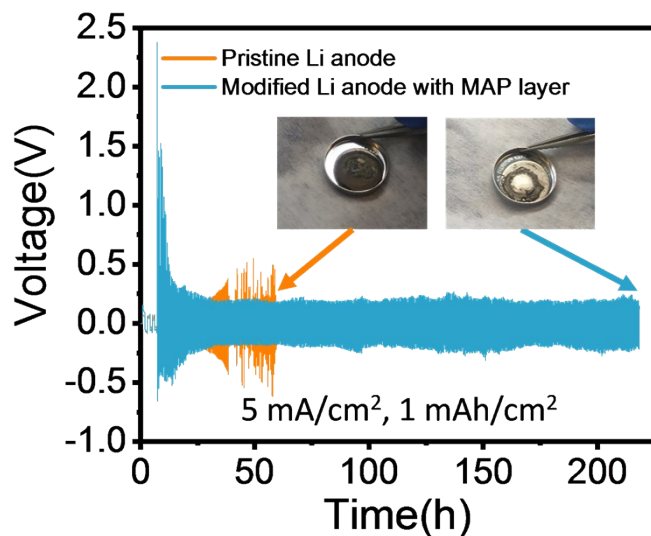

**Figure S5.** Comparison of the long-term cycling stability of Li/Li symmetric batteries with a pristine Li anode and a Li anode modified with a MAP layer at  $5\text{ mA/cm}^2$  and  $1\text{ mAh/cm}^2$ .

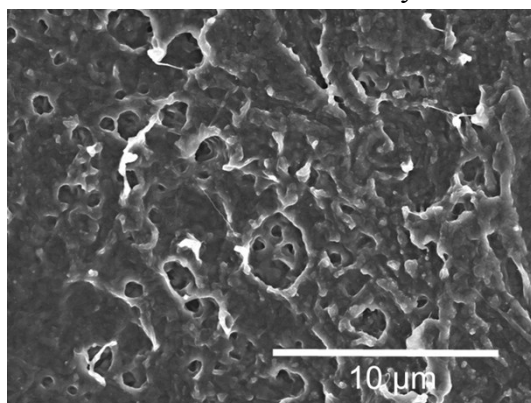

**Figure S6.** The top-view morphology of GO@PVDF-HFP layer.

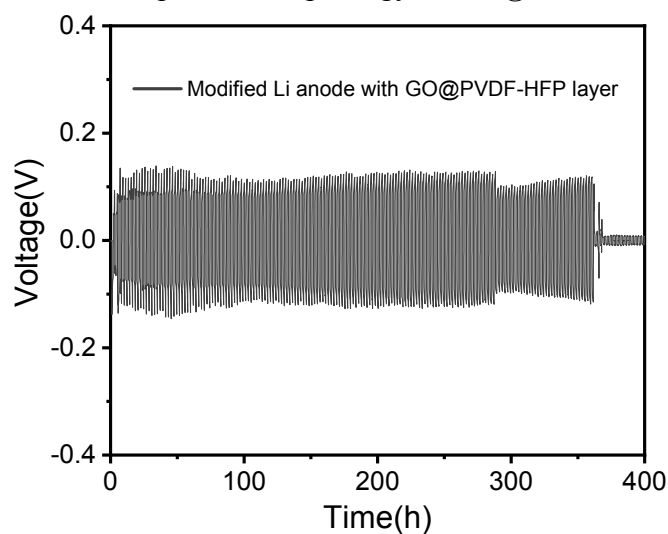

**Figure S7.** Voltage profile of continuous Li plating/stripping cycling of symmetric cell assembled with GO@PVDF-HFP-Li anode at a current density of  $1\text{ mA}\cdot\text{cm}^{-2}$  and a capacity

of  $1 \text{ mAh}\cdot\text{cm}^{-2}$ .

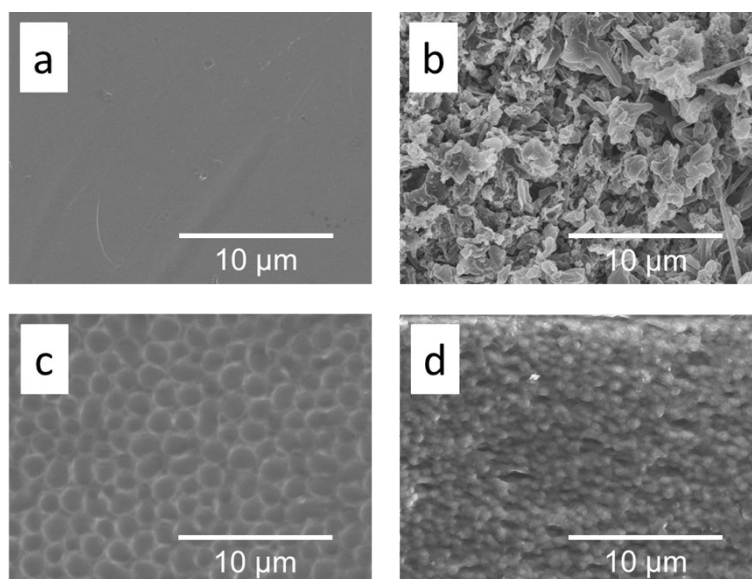

**Figure S8.** The magnified images of uncyclized (a) and cyclized (b) pristine Li metal, and uncyclized (c) and cyclized (d) MAP-Li anodes.

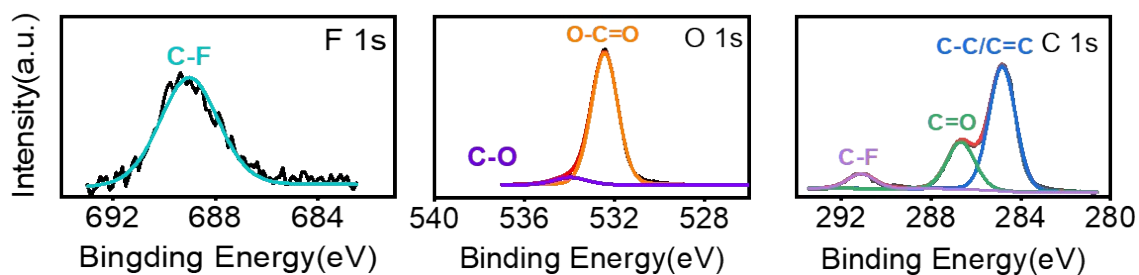

**Figure S9.** The O 1s, C 1s, and F 1s spectra of MAP layer.

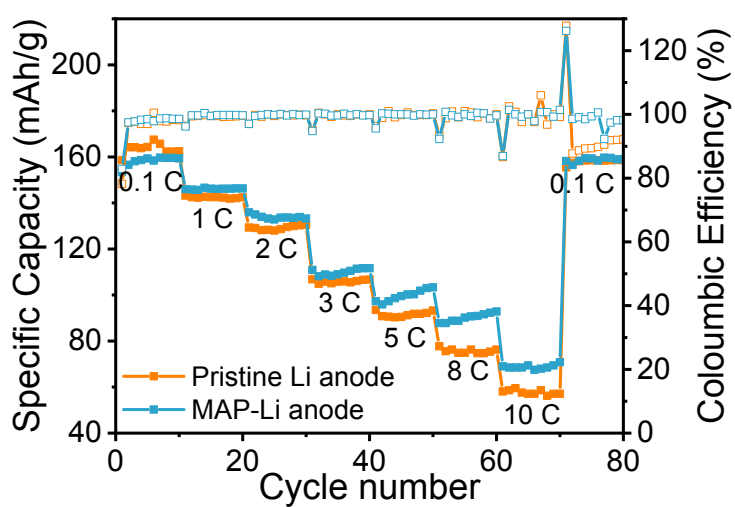

**Figure S10.** Comparison of the rate performance of  $\text{LiFePO}_4/\text{Li}$  cells with pristine and modified Li anodes.
